# Supplementary material
Source: HighWire-hosted journal article supplement (https://erj.ersjournals.com/content/57/5/2000443)
Supplement: inline-supplementary-material-2 [file inline-supplementary-material-2.pdf]

|                     |               |          |          |        |        |        |         |
|---------------------|---------------|----------|----------|--------|--------|--------|---------|
| Aged Lung,<br>Day 5 | <i>Ido1</i>   | 17.0251  | 0.3449   | vs YD5 | 0.0014 | vs AD3 | <0.0001 |
| Aged Lung,<br>Day 5 | <i>Oxct2a</i> | 218.9703 | 20.7026  | vs YD5 | 0.4072 | vs AD3 | 0.3982  |
| Aged Lung,<br>Day 5 | <i>Srm</i>    | 3.8886   | 4.8877   | vs YD5 | 0.3158 | vs AD3 | 0.5845  |
| Aged Lung,<br>Day 5 | <i>Tph2</i>   | 10.4179  | 8.7654   | vs YD5 | 0.5742 | vs AD3 | 0.6208  |
| Aged Lung,<br>Day 7 | <i>Ahcy</i>   | 74.7335  | 38.1660  | vs YD7 | 0.028  | vs AD5 | 0.0984  |
| Aged Lung,<br>Day 7 | <i>Bhmt</i>   | 420.1965 | 178.2890 | vs YD7 | 0.0152 | vs AD5 | 0.1469  |
| Aged Lung,<br>Day 7 | <i>Ido1</i>   | 31.8139  | 4.6891   | vs YD7 | 0.0003 | vs AD5 | 0.0055  |
| Aged Lung,<br>Day 7 | <i>Oxct2a</i> | 526.6681 | 141.6959 | vs YD7 | 0.0031 | vs AD5 | 0.0453  |
| Aged Lung,<br>Day 7 | <i>Srm</i>    | 12.8656  | 7.1444   | vs YD7 | 0.0386 | vs AD5 | 0.1469  |
| Aged Lung,<br>Day 7 | <i>Tph2</i>   | 15.0500  | 2.5880   | vs YD7 | 0.0018 | vs AD5 | 0.4294  |

**Supplemental Table 1 (related to Figure 6):** Metabolic gene expression in young and aged murine lung and alveolar macrophages during influenza infection.
