# Supplementary material
Source: HighWire-hosted journal article supplement (https://erj.ersjournals.com/content/57/5/2000443)
Supplement: inline-supplementary-material-3 [file inline-supplementary-material-3.pdf]

| Sample       | Gene Symbol    | Accession Number | Fold Regulation (Comparing to Young Control Group) | Standard Deviation | p-value |
|--------------|----------------|------------------|----------------------------------------------------|--------------------|---------|
| Aged Control | <i>Dnm1</i>    | NM_152816        | 1.58                                               | 0.234245           | <.00001 |
| Aged Control | <i>Uxt</i>     | NM_013840        | 9.39                                               | 0.234245           | <.00001 |
| Aged Control | <i>Lrpprc</i>  | NM_028233        | 13.68                                              | 0.008263           | <.00001 |
| Aged Control | <i>Msto1</i>   | NM_144898        | 66.73                                              | 0.007589           | <.00001 |
| Aged Control | <i>Rhot1</i>   | NM_021536        | -207.69                                            | 0.00823            | <.00001 |
| Aged Control | <i>Opa1</i>    | NM_133752        | -3.14                                              | 0.031803           | <.00001 |
| Aged Control | <i>Nefl</i>    | NM_010910        | 61.63                                              | 0.018787           | <.00001 |
| Aged Control | <i>Rhot2</i>   | NM_145999        | 3.48                                               | 0.013376           | <.00001 |
| Aged Control | <i>Fis1</i>    | NM_025562        | -5.13                                              | 0.019065           | <.00001 |
| Aged Control | <i>Cox10</i>   | NM_178379        | 17.27                                              | 0.003446           | <.00001 |
| Aged Control | <i>Timm23</i>  | NM_016897        | 1.39                                               | 0.004842           | <.00001 |
| Aged Control | <i>Timm44</i>  | NM_011592        | -1.04                                              | 0.00398            | <.00001 |
| Aged Control | <i>Timm10</i>  | NM_013899        | 8.39                                               | 0.023751           | <.00001 |
| Aged Control | <i>Timm50</i>  | NM_025616        | 1.85                                               | 0.044106           | <.00001 |
| Aged Control | <i>Immp1l</i>  | NM_028260        | -1.19                                              | 0.034824           | <.00001 |
| Aged Control | <i>Timm17a</i> | NM_011590        | 1.53                                               | 0.028881           | <.00001 |
| Aged Control | <i>Immp2l</i>  | NM_053122        | 1.18                                               | 0.234245           | <.00001 |
| Aged Control | <i>Timm8b</i>  | NM_013897        | 2.99                                               | 0.095470           | <.00001 |
| Aged Control | <i>Timm22</i>  | NM_019818        | 14.38                                              | 0.047256           | <.00001 |
| Aged Control | <i>Timm8a1</i> | NM_013898        | 17.41                                              | 0.063537           | <.00001 |
| Aged Control | <i>Timm9</i>   | NM_001024853     | 3.87                                               | 0.002554           | <.00001 |
| Aged Control | <i>Taz</i>     | NM_181516        | 2.48                                               | 0.028792           | <.00001 |
| Aged Control | <i>Timm17b</i> | NM_011591        | 10.11                                              | 0.014457           | <.00001 |
| Aged Control | <i>Tspo</i>    | NM_009775        | 1.28                                               | 0.234245           | <.00001 |
| Aged Control | <i>Aip</i>     | NM_016666        | -326.34                                            | 0.003166           | <.00001 |
| Aged Control | <i>Hspd1</i>   | NM_010477        | -90.97                                             | 0.054196           | <.00001 |
| Aged Control | <i>Mipep</i>   | NM_027436        | -64.85                                             | 0.013615           | <.00001 |
| Aged Control | <i>Dnajc19</i> | NM_026332        | 12.4                                               | 0.061241           | <.00001 |
| Aged Control | <i>Grpel1</i>  | NM_024478        | 2.33                                               | 0.012067           | <.00001 |
| Aged Control | <i>Bak1</i>    | NM_007523        | -161                                               | 0.178643           | <.00001 |
| Aged Control | <i>Ucp2</i>    | NM_011671        | -6.6                                               | 0.024373           | <.00001 |
| Aged Control | <i>Bcl2l1</i>  | NM_009743        | 3.53                                               | 0.014027           | <.00001 |
| Aged Control | <i>Stard3</i>  | NM_021547        | 2.65                                               | 0.031873           | <.00001 |
| Aged Control | <i>Ucp3</i>    | NM_009464        | 7.6                                                | 0.108464           | <.00001 |
| Aged Control | <i>Mtx2</i>    | NM_016804        | -5.55                                              | 0.020456           | <.00001 |
| Aged Control | <i>Trp53</i>   | NM_011640        | 1.74                                               | 0.069787           | <.00001 |
| Aged Control | <i>Bcl2</i>    | NM_009741        | 8.67                                               | 0.010395           | <.00001 |
| Aged Control | <i>Cpt2</i>    | NM_009949        | 34.97                                              | 0.034522           | <.00001 |
| Aged Control | <i>Bnip3</i>   | NM_009760        | 3.02                                               | 0.028107           | <.00001 |
| Aged Control | <i>Ucp1</i>    | NM_009463        | 271.99                                             | 0.027232           | <.00001 |

| Sample       | Gene Symbol    | Accession Number | Fold Regulation (Comparing to Age-Matched Control Group) | Standard Deviation | p-value  |
|--------------|----------------|------------------|----------------------------------------------------------|--------------------|----------|
| Young, Day 3 | <i>Dnm1</i>    | NM_152816        | -1.21                                                    | 0.276608           | 0.022    |
| Young, Day 3 | <i>Uxt</i>     | NM_013840        | 1.11                                                     | 0.136816           | 0.325    |
| Young, Day 3 | <i>Lrpprc</i>  | NM_028233        | -1.67                                                    | 0.206227           | <.00001  |
| Young, Day 3 | <i>Msto1</i>   | NM_144898        | -1.52                                                    | 0.257993           | 0.0015   |
| Young, Day 3 | <i>Rhot1</i>   | NM_021536        | -1.81                                                    | 0.411938           | <.00001  |
| Young, Day 3 | <i>Opa1</i>    | NM_133752        | -1.93                                                    | 0.176302           | 0.0098   |
| Young, Day 3 | <i>Nefl</i>    | NM_010910        | -16.03                                                   | 0.464787           | <.00001  |
| Young, Day 3 | <i>Rhot2</i>   | NM_145999        | -1.41                                                    | 0.088974           | 0.0383   |
| Young, Day 3 | <i>Fis1</i>    | NM_025562        | -1.24                                                    | 0.294903           | 0.004282 |
| Young, Day 3 | <i>Cox10</i>   | NM_178379        | -1.41                                                    | 0.278589           | 0.03421  |
| Young, Day 3 | <i>Timm23</i>  | NM_016897        | -1.16                                                    | 0.046935           | 0.1079   |
| Young, Day 3 | <i>Timm44</i>  | NM_011592        | -1.3                                                     | 0.048469           | <.00001  |
| Young, Day 3 | <i>Timm10</i>  | NM_013899        | -1.01                                                    | 0.134599           | 0.962442 |
| Young, Day 3 | <i>Timm50</i>  | NM_025616        | -1.32                                                    | 0.096663           | 0.001482 |
| Young, Day 3 | <i>Immp1l</i>  | NM_028260        | -1.16                                                    | 0.252645           | 0.312214 |
| Young, Day 3 | <i>Timm17a</i> | NM_011590        | -1.5                                                     | 0.229514           | 0.006123 |
| Young, Day 3 | <i>Immp2l</i>  | NM_053122        | -1.14                                                    | 0.258759           | 0.5616   |
| Young, Day 3 | <i>Timm8b</i>  | NM_013897        | -1.13                                                    | 0.125470           | 0.615718 |
| Young, Day 3 | <i>Timm22</i>  | NM_019818        | -1.4                                                     | 0.312279           | <.00001  |
| Young, Day 3 | <i>Timm8a1</i> | NM_013898        | 1.02                                                     | 0.407620           | 0.775596 |
| Young, Day 3 | <i>Timm9</i>   | NM_001024853     | -1.24                                                    | 0.034566           | 0.357806 |
| Young, Day 3 | <i>Taz</i>     | NM_181516        | -1.96                                                    | 0.106519           | 0.00106  |
| Young, Day 3 | <i>Timm17b</i> | NM_011591        | -1.24                                                    | 0.227383           | 0.053124 |
| Young, Day 3 | <i>Tspo</i>    | NM_009775        | 2.02                                                     | 0.081228           | 0.006535 |
| Young, Day 3 | <i>Aip</i>     | NM_016666        | -1.2                                                     | 0.148237           | 0.025979 |
| Young, Day 3 | <i>Hspd1</i>   | NM_010477        | -1.33                                                    | 0.263548           | 0.003565 |
| Young, Day 3 | <i>Mipep</i>   | NM_027436        | -1.52                                                    | 0.478993           | 0.000322 |
| Young, Day 3 | <i>Dnajc19</i> | NM_026332        | -1.35                                                    | 0.450200           | <.00001  |
| Young, Day 3 | <i>Grpel1</i>  | NM_024478        | -1.3                                                     | 0.214436           | 0.033441 |
| Young, Day 3 | <i>Bak1</i>    | NM_007523        | 1.91                                                     | 0.179809           | 0.018645 |
| Young, Day 3 | <i>Ucp2</i>    | NM_011671        | 1.15                                                     | 0.339305           | 0.429549 |
| Young, Day 3 | <i>Bcl2l1</i>  | NM_009743        | 1.8                                                      | 0.270009           | 0.052695 |
| Young, Day 3 | <i>Stard3</i>  | NM_021547        | 1.18                                                     | 0.132324           | 0.028373 |
| Young, Day 3 | <i>Ucp3</i>    | NM_009464        | -1.82                                                    | 0.342365           | 0.149324 |
| Young, Day 3 | <i>Mtx2</i>    | NM_016804        | -1.39                                                    | 0.136178           | 0.020888 |
| Young, Day 3 | <i>Trp53</i>   | NM_011640        | -1.18                                                    | 0.349259           | 0.008851 |
| Young, Day 3 | <i>Bcl2</i>    | NM_009741        | -1.34                                                    | 0.376117           | 0.038421 |
| Young, Day 3 | <i>Cpt2</i>    | NM_009949        | -1.3                                                     | 0.404090           | <.00001  |
| Young, Day 3 | <i>Bnip3</i>   | NM_009760        | -1.8                                                     | 0.046847           | 0.019592 |
| Young, Day 3 | <i>Ucp1</i>    | NM_009463        | -1.27                                                    | 0.146030           | 0.184052 |
| Young, Day 5 | <i>Dnm1</i>    | NM_152816        | 1.42                                                     | 0.504624           | <.00001  |

|              |                |              |         |          |          |
|--------------|----------------|--------------|---------|----------|----------|
| Young, Day 5 | <i>Uxt</i>     | NM_013840    | 12.65   | 0.504624 | 0.03981  |
| Young, Day 5 | <i>Lrpprc</i>  | NM_028233    | 11.49   | 0.245218 | <.00001  |
| Young, Day 5 | <i>Msto1</i>   | NM_144898    | 62.02   | 0.129610 | 0.011003 |
| Young, Day 5 | <i>Rhot1</i>   | NM_021536    | -59.82  | 0.049236 | <.00001  |
| Young, Day 5 | <i>Opa1</i>    | NM_133752    | -1.55   | 0.118029 | 0.041582 |
| Young, Day 5 | <i>Nefl</i>    | NM_010910    | 71.88   | 0.080253 | <.00001  |
| Young, Day 5 | <i>Rhot2</i>   | NM_145999    | 2.71    | 0.265818 | <.00001  |
| Young, Day 5 | <i>Fis1</i>    | NM_025562    | -1.94   | 0.416093 | 0.005582 |
| Young, Day 5 | <i>Cox10</i>   | NM_178379    | 7.75    | 0.136866 | 0.007912 |
| Young, Day 5 | <i>Timm23</i>  | NM_016897    | 1.29    | 0.334353 | 0.003668 |
| Young, Day 5 | <i>Timm44</i>  | NM_011592    | -1.63   | 0.425082 | 0.002017 |
| Young, Day 5 | <i>Timm10</i>  | NM_013899    | 8.09    | 0.063743 | <.00001  |
| Young, Day 5 | <i>Timm50</i>  | NM_025616    | 1.37    | 0.450599 | 0.002651 |
| Young, Day 5 | <i>Immp1l</i>  | NM_028260    | -1.6    | 0.203274 | 0.002205 |
| Young, Day 5 | <i>Timm17a</i> | NM_011590    | 1.2     | 0.192552 | 0.024196 |
| Young, Day 5 | <i>Immp2l</i>  | NM_053122    | -1.06   | 0.504624 | 0.784423 |
| Young, Day 5 | <i>Timm8b</i>  | NM_013897    | 2.14    | 0.010644 | 0.058192 |
| Young, Day 5 | <i>Timm22</i>  | NM_019818    | -1.52   | 0.194743 | 0.0068   |
| Young, Day 5 | <i>Timm8a1</i> | NM_013898    | 26.9    | 0.351398 | 0.04255  |
| Young, Day 5 | <i>Timm9</i>   | NM_001024853 | 3.17    | 0.110566 | 0.0003   |
| Young, Day 5 | <i>Taz</i>     | NM_181516    | 1.61    | 0.560437 | <.00001  |
| Young, Day 5 | <i>Timm17b</i> | NM_011591    | 5.57    | 0.419023 | <.00001  |
| Young, Day 5 | <i>Tspo</i>    | NM_009775    | 1.35    | 0.144071 | <.00001  |
| Young, Day 5 | <i>Aip</i>     | NM_016666    | -211.05 | 0.567809 | <.00001  |
| Young, Day 5 | <i>Hspd1</i>   | NM_010477    | -119.66 | 0.591613 | <.00001  |
| Young, Day 5 | <i>Mipep</i>   | NM_027436    | -32.97  | 0.238810 | <.00001  |
| Young, Day 5 | <i>Dnajc19</i> | NM_026332    | 10.28   | 0.452715 | 0.006514 |
| Young, Day 5 | <i>Grpel1</i>  | NM_024478    | 1.04    | 0.437263 | 0.621469 |
| Young, Day 5 | <i>Bak1</i>    | NM_007523    | -104.12 | 0.649544 | <.00001  |
| Young, Day 5 | <i>Ucp2</i>    | NM_011671    | -8.05   | 0.007086 | <.00001  |
| Young, Day 5 | <i>Bcl2l1</i>  | NM_009743    | 2.3     | 0.395370 | <.00001  |
| Young, Day 5 | <i>Stard3</i>  | NM_021547    | 1.06    | 0.092171 | 0.645164 |
| Young, Day 5 | <i>Ucp3</i>    | NM_009464    | 9.21    | 0.567306 | 0.006138 |
| Young, Day 5 | <i>Mtx2</i>    | NM_016804    | -7.21   | 0.195900 | <.00001  |
| Young, Day 5 | <i>Trp53</i>   | NM_011640    | 1.65    | 0.496157 | 0.021792 |
| Young, Day 5 | <i>Bcl2</i>    | NM_009741    | 6.36    | 0.542077 | <.00001  |
| Young, Day 5 | <i>Cpt2</i>    | NM_009949    | 13.05   | 0.088991 | 0.002113 |
| Young, Day 5 | <i>Bnip3</i>   | NM_009760    | 3.32    | 0.149408 | <.00001  |
| Young, Day 5 | <i>Ucp1</i>    | NM_009463    | 9.21    | 0.168199 | 0.006138 |
| Young, Day 7 | <i>Dnm1</i>    | NM_152816    | 1.05    | 0.597455 | 0.035165 |
| Young, Day 7 | <i>Uxt</i>     | NM_013840    | 6.13    | 1.066828 | 0.005907 |
| Young, Day 7 | <i>Lrpprc</i>  | NM_028233    | 7.14    | 0.109391 | <.00001  |
| Young, Day 7 | <i>Msto1</i>   | NM_144898    | 32.86   | 0.037669 | 0.005234 |
| Young, Day 7 | <i>Rhot1</i>   | NM_021536    | -156.09 | 0.270979 | <.00001  |
| Young, Day 7 | <i>Opa1</i>    | NM_133752    | -3.8    | 0.188513 | <.00001  |
| Young, Day 7 | <i>Nefl</i>    | NM_010910    | 35.64   | 0.077665 | <.00001  |
| Young, Day 7 | <i>Rhot2</i>   | NM_145999    | 1.59    | 0.241696 | 0.00136  |
| Young, Day 7 | <i>Fis1</i>    | NM_025562    | -5.22   | 0.150909 | <.00001  |
| Young, Day 7 | <i>Cox10</i>   | NM_178379    | 9.06    | 0.235001 | <.00001  |

|              |                |              |         |          |          |
|--------------|----------------|--------------|---------|----------|----------|
| Young, Day 7 | <i>Timm23</i>  | NM_016897    | -1.49   | 0.377833 | <.00001  |
| Young, Day 7 | <i>Timm44</i>  | NM_011592    | -2.37   | 0.235430 | <.00001  |
| Young, Day 7 | <i>Timm10</i>  | NM_013899    | 4.84    | 0.025478 | <.00001  |
| Young, Day 7 | <i>Timm50</i>  | NM_025616    | -1      | 0.210938 | 0.979085 |
| Young, Day 7 | <i>Immp1l</i>  | NM_028260    | -2.93   | 0.157736 | <.00001  |
| Young, Day 7 | <i>Timm17a</i> | NM_011590    | 1.25    | 0.210426 | 0.164741 |
| Young, Day 7 | <i>Immp2l</i>  | NM_053122    | -2      | 0.597455 | <.00001  |
| Young, Day 7 | <i>Timm8b</i>  | NM_013897    | 1.53    | 0.537806 | 0.053186 |
| Young, Day 7 | <i>Timm22</i>  | NM_019818    | 6.71    | 0.328362 | 0.0339   |
| Young, Day 7 | <i>Timm8a1</i> | NM_013898    | 10.02   | 0.083040 | 0.013729 |
| Young, Day 7 | <i>Timm9</i>   | NM_001024853 | 2.05    | 0.129774 | <.00001  |
| Young, Day 7 | <i>Taz</i>     | NM_181516    | 1.33    | 0.176826 | 0.000401 |
| Young, Day 7 | <i>Timm17b</i> | NM_011591    | 3.84    | 0.334999 | <.00001  |
| Young, Day 7 | <i>Tspo</i>    | NM_009775    | -1.04   | 0.188223 | 0.18011  |
| Young, Day 7 | <i>Aip</i>     | NM_016666    | -538.53 | 0.444077 | <.00001  |
| Young, Day 7 | <i>Hspd1</i>   | NM_010477    | -210.73 | 0.467772 | <.00001  |
| Young, Day 7 | <i>Mipep</i>   | NM_027436    | -86.83  | 0.201459 | <.00001  |
| Young, Day 7 | <i>Dnajc19</i> | NM_026332    | 5.32    | 0.143707 | 0.000945 |
| Young, Day 7 | <i>Grpel1</i>  | NM_024478    | -5.66   | 0.519921 | <.00001  |
| Young, Day 7 | <i>Bak1</i>    | NM_007523    | -349.18 | 0.462343 | <.00001  |
| Young, Day 7 | <i>Ucp2</i>    | NM_011671    | -8.99   | 0.113515 | <.00001  |
| Young, Day 7 | <i>Bcl2l1</i>  | NM_009743    | 1.94    | 0.180355 | 0.010866 |
| Young, Day 7 | <i>Stard3</i>  | NM_021547    | 1.31    | 0.213277 | 0.000647 |
| Young, Day 7 | <i>Ucp3</i>    | NM_009464    | 4.26    | 0.131223 | 0.000518 |
| Young, Day 7 | <i>Mtx2</i>    | NM_016804    | -27.05  | 0.249469 | <.00001  |
| Young, Day 7 | <i>Trp53</i>   | NM_011640    | -1.61   | 0.202487 | 0.001181 |
| Young, Day 7 | <i>Bcl2</i>    | NM_009741    | 5.38    | 0.482395 | <.00001  |
| Young, Day 7 | <i>Cpt2</i>    | NM_009949    | 14.54   | 0.122620 | 0.003356 |
| Young, Day 7 | <i>Bnip3</i>   | NM_009760    | 2.24    | 0.118614 | <.00001  |
| Young, Day 7 | <i>Ucp1</i>    | NM_009463    | 175.36  | 0.151104 | <.00001  |
| Aged, Day 3  | <i>Dnm1</i>    | NM_152816    | 1.55    | 0.009084 | 0.043715 |
| Aged, Day 3  | <i>Uxt</i>     | NM_013840    | 11.24   | 0.008823 | 0.15646  |
| Aged, Day 3  | <i>Lrpprc</i>  | NM_028233    | 15.4    | 0.069221 | 0.00436  |
| Aged, Day 3  | <i>Msto1</i>   | NM_144898    | 74.84   | 0.040968 | 0.002063 |
| Aged, Day 3  | <i>Rhot1</i>   | NM_021536    | -27.81  | 0.009290 | <.00001  |
| Aged, Day 3  | <i>Opa1</i>    | NM_133752    | -2.39   | 0.009989 | 0.009518 |
| Aged, Day 3  | <i>Nefl</i>    | NM_010910    | 72.55   | 0.011790 | <.00001  |
| Aged, Day 3  | <i>Rhot2</i>   | NM_145999    | 3.56    | 0.015750 | <.00001  |
| Aged, Day 3  | <i>Fis1</i>    | NM_025562    | -2.23   | 0.022224 | 0.001792 |
| Aged, Day 3  | <i>Cox10</i>   | NM_178379    | 10.99   | 0.014878 | <.00001  |
| Aged, Day 3  | <i>Timm23</i>  | NM_016897    | 1.56    | 0.015046 | 0.001236 |
| Aged, Day 3  | <i>Timm44</i>  | NM_011592    | -1.49   | 0.011485 | 0.000632 |
| Aged, Day 3  | <i>Timm10</i>  | NM_013899    | 9.17    | 0.002329 | 0.00416  |
| Aged, Day 3  | <i>Timm50</i>  | NM_025616    | 2.5     | 0.034689 | 0.072834 |
| Aged, Day 3  | <i>Immp1l</i>  | NM_028260    | 1.04    | 0.023079 | 0.714177 |
| Aged, Day 3  | <i>Timm17a</i> | NM_011590    | 1.37    | 0.018242 | 0.176057 |
| Aged, Day 3  | <i>Immp2l</i>  | NM_053122    | 1.97    | 0.029655 | 0.077852 |
| Aged, Day 3  | <i>Timm8b</i>  | NM_013897    | 2.7     | 0.009976 | 0.002277 |
| Aged, Day 3  | <i>Timm22</i>  | NM_019818    | 21.59   | 0.003378 | 0.015706 |

|             |                |              |        |          |          |
|-------------|----------------|--------------|--------|----------|----------|
| Aged, Day 3 | <i>Timm8a1</i> | NM_013898    | 24     | 0.023224 | 0.005406 |
| Aged, Day 3 | <i>Timm9</i>   | NM_001024853 | 2.65   | 0.041939 | 0.000884 |
| Aged, Day 3 | <i>Taz</i>     | NM_181516    | 1.94   | 0.035182 | 0.011774 |
| Aged, Day 3 | <i>Timm17b</i> | NM_011591    | 5.65   | 0.014351 | <.00001  |
| Aged, Day 3 | <i>Tspo</i>    | NM_009775    | 1.7    | 0.015642 | 0.012537 |
| Aged, Day 3 | <i>Aip</i>     | NM_016666    | -42.52 | 0.039833 | <.00001  |
| Aged, Day 3 | <i>Hspd1</i>   | NM_010477    | -27.8  | 0.057325 | <.00001  |
| Aged, Day 3 | <i>Mipep</i>   | NM_027436    | -8.45  | 0.034962 | 0.001985 |
| Aged, Day 3 | <i>Dnajc19</i> | NM_026332    | 11.05  | 0.025641 | 0.004137 |
| Aged, Day 3 | <i>Grpel1</i>  | NM_024478    | 2.74   | 0.033677 | 0.04677  |
| Aged, Day 3 | <i>Bak1</i>    | NM_007523    | -20.98 | 0.024509 | <.00001  |
| Aged, Day 3 | <i>Ucp2</i>    | NM_011671    | -6.04  | 0.081806 | <.00001  |
| Aged, Day 3 | <i>Bcl2l1</i>  | NM_009743    | 2.77   | 0.040080 | 0.004991 |
| Aged, Day 3 | <i>Stard3</i>  | NM_021547    | 1.97   | 0.024514 | 0.103553 |
| Aged, Day 3 | <i>Ucp3</i>    | NM_009464    | 9.94   | 0.033115 | 0.002557 |
| Aged, Day 3 | <i>Mtx2</i>    | NM_016804    | -9.18  | 0.025300 | <.00001  |
| Aged, Day 3 | <i>Trp53</i>   | NM_011640    | 2.45   | 0.044229 | 0.141116 |
| Aged, Day 3 | <i>Bcl2</i>    | NM_009741    | 7.55   | 0.008663 | 0.000132 |
| Aged, Day 3 | <i>Cpt2</i>    | NM_009949    | 24     | 0.021854 | 0.037972 |
| Aged, Day 3 | <i>Bnip3</i>   | NM_009760    | 3.48   | 0.036900 | 0.014444 |
| Aged, Day 3 | <i>Ucp1</i>    | NM_009463    | 341.22 | 0.020438 | 0.004431 |
| Aged, Day 5 | <i>Dnm1</i>    | NM_152816    | -1.01  | 0.146542 | 0.911012 |
| Aged, Day 5 | <i>Uxt</i>     | NM_013840    | 6.33   | 0.095936 | 0.02311  |
| Aged, Day 5 | <i>Lrpprc</i>  | NM_028233    | 7.73   | 0.500106 | 0.022061 |
| Aged, Day 5 | <i>Msto1</i>   | NM_144898    | 32.86  | 0.245397 | 0.038452 |
| Aged, Day 5 | <i>Rhot1</i>   | NM_021536    | -27.45 | 0.079576 | 0.030487 |
| Aged, Day 5 | <i>Opa1</i>    | NM_133752    | -2.29  | 0.186770 | 0.945039 |
| Aged, Day 5 | <i>Nefl</i>    | NM_010910    | 51.56  | 0.256888 | 0.000145 |
| Aged, Day 5 | <i>Rhot2</i>   | NM_145999    | 2.15   | 0.233226 | 0.000215 |
| Aged, Day 5 | <i>Fis1</i>    | NM_025562    | -2.55  | 0.985528 | 0.084987 |
| Aged, Day 5 | <i>Cox10</i>   | NM_178379    | 9.84   | 0.169465 | 0.003546 |
| Aged, Day 5 | <i>Timm23</i>  | NM_016897    | -1.25  | 0.346803 | 0.203831 |
| Aged, Day 5 | <i>Timm44</i>  | NM_011592    | -1.77  | 0.048058 | 0.001601 |
| Aged, Day 5 | <i>Timm10</i>  | NM_013899    | 7.5    | 0.315747 | 0.003268 |
| Aged, Day 5 | <i>Timm50</i>  | NM_025616    | 1.39   | 0.108186 | 0.000517 |
| Aged, Day 5 | <i>Immp1l</i>  | NM_028260    | -1.14  | 0.272310 | 0.886216 |
| Aged, Day 5 | <i>Timm17a</i> | NM_011590    | 1.31   | 0.200554 | 0.221618 |
| Aged, Day 5 | <i>Immp2l</i>  | NM_053122    | 2.51   | 0.233891 | 0.325789 |
| Aged, Day 5 | <i>Timm8b</i>  | NM_013897    | 2.81   | 0.200125 | 0.044259 |
| Aged, Day 5 | <i>Timm22</i>  | NM_019818    | 12.33  | 0.089578 | <.00001  |
| Aged, Day 5 | <i>Timm8a1</i> | NM_013898    | 14.97  | 0.186268 | 0.000224 |
| Aged, Day 5 | <i>Timm9</i>   | NM_001024853 | 3.31   | 0.050286 | 0.03209  |
| Aged, Day 5 | <i>Taz</i>     | NM_181516    | 1.55   | 0.087231 | 0.090484 |
| Aged, Day 5 | <i>Timm17b</i> | NM_011591    | 7.63   | 0.441561 | 0.002352 |
| Aged, Day 5 | <i>Tspo</i>    | NM_009775    | 1      | 0.430336 | 0.924165 |
| Aged, Day 5 | <i>Aip</i>     | NM_016666    | -42.66 | 0.445553 | 0.059826 |
| Aged, Day 5 | <i>Hspd1</i>   | NM_010477    | -8.78  | 0.100013 | 0.266323 |
| Aged, Day 5 | <i>Mipep</i>   | NM_027436    | -6.09  | 0.164420 | 0.992009 |
| Aged, Day 5 | <i>Dnajc19</i> | NM_026332    | 9.03   | 0.037270 | <.00001  |

|             |                |              |        |          |          |
|-------------|----------------|--------------|--------|----------|----------|
| Aged, Day 5 | <i>Grpel1</i>  | NM_024478    | 1.52   | 0.278815 | 0.050674 |
| Aged, Day 5 | <i>Bak1</i>    | NM_007523    | -27.01 | 0.170585 | 0.07297  |
| Aged, Day 5 | <i>Ucp2</i>    | NM_011671    | -6.03  | 0.257942 | 0.000204 |
| Aged, Day 5 | <i>Bcl2l1</i>  | NM_009743    | 2.83   | 0.074613 | <.00001  |
| Aged, Day 5 | <i>Stard3</i>  | NM_021547    | 1.41   | 0.234839 | 0.031205 |
| Aged, Day 5 | <i>Ucp3</i>    | NM_009464    | 9.83   | 0.309822 | 0.117646 |
| Aged, Day 5 | <i>Mtx2</i>    | NM_016804    | -3.67  | 0.426456 | 0.598652 |
| Aged, Day 5 | <i>Trp53</i>   | NM_011640    | 2.55   | 0.845030 | 0.325059 |
| Aged, Day 5 | <i>Bcl2</i>    | NM_009741    | 6.32   | 0.231227 | <.00001  |
| Aged, Day 5 | <i>Cpt2</i>    | NM_009949    | 13.88  | 0.118755 | 0.081    |
| Aged, Day 5 | <i>Bnip3</i>   | NM_009760    | 2.46   | 0.136180 | 0.001122 |
| Aged, Day 5 | <i>Ucp1</i>    | NM_009463    | 205.48 | 0.289786 | <.00001  |
| Aged, Day 7 | <i>Dnm1</i>    | NM_152816    | -1.22  | 0.338499 | 0.00575  |
| Aged, Day 7 | <i>Uxt</i>     | NM_013840    | 2.86   | 0.692317 | <.00001  |
| Aged, Day 7 | <i>Lrpprc</i>  | NM_028233    | 3.42   | 0.414982 | 0.00086  |
| Aged, Day 7 | <i>Msto1</i>   | NM_144898    | 10.26  | 0.173457 | 0.004218 |
| Aged, Day 7 | <i>Rhot1</i>   | NM_021536    | -1.83  | 0.720092 | 0.000729 |
| Aged, Day 7 | <i>Opa1</i>    | NM_133752    | 3.79   | 0.501125 | 0.007413 |
| Aged, Day 7 | <i>Nefl</i>    | NM_010910    | 126.73 | 0.355153 | 0.009879 |
| Aged, Day 7 | <i>Rhot2</i>   | NM_145999    | 4.62   | 0.495839 | <.00001  |
| Aged, Day 7 | <i>Fis1</i>    | NM_025562    | 3.31   | 0.174977 | 0.110276 |
| Aged, Day 7 | <i>Cox10</i>   | NM_178379    | 5.99   | 0.092679 | 0.014145 |
| Aged, Day 7 | <i>Timm23</i>  | NM_016897    | -1.51  | 0.319041 | 0.045507 |
| Aged, Day 7 | <i>Timm44</i>  | NM_011592    | -3.31  | 0.901894 | <.00001  |
| Aged, Day 7 | <i>Timm10</i>  | NM_013899    | 11.21  | 0.242170 | 0.001588 |
| Aged, Day 7 | <i>Timm50</i>  | NM_025616    | 2.13   | 0.434837 | 0.00547  |
| Aged, Day 7 | <i>Immp1l</i>  | NM_028260    | 2.2    | 0.028053 | 0.000214 |
| Aged, Day 7 | <i>Timm17a</i> | NM_011590    | 3.77   | 0.233049 | 0.033529 |
| Aged, Day 7 | <i>Immp2l</i>  | NM_053122    | 33.81  | 0.117738 | 0.008799 |
| Aged, Day 7 | <i>Timm8b</i>  | NM_013897    | 8.34   | 0.100017 | <.00001  |
| Aged, Day 7 | <i>Timm22</i>  | NM_019818    | 10.67  | 1.234722 | <.00001  |
| Aged, Day 7 | <i>Timm8a1</i> | NM_013898    | 21.26  | 0.089677 | <.00001  |
| Aged, Day 7 | <i>Timm9</i>   | NM_001024853 | 2.02   | 0.215694 | 0.000161 |
| Aged, Day 7 | <i>Taz</i>     | NM_181516    | 1.39   | 0.095744 | 0.036774 |
| Aged, Day 7 | <i>Timm17b</i> | NM_011591    | 2.7    | 0.833042 | 0.001452 |
| Aged, Day 7 | <i>Tspo</i>    | NM_009775    | -1.09  | 0.514886 | 0.206547 |
| Aged, Day 7 | <i>Aip</i>     | NM_016666    | -1.14  | 0.142870 | 0.003014 |
| Aged, Day 7 | <i>Hspd1</i>   | NM_010477    | 1.98   | 0.120963 | <.00001  |
| Aged, Day 7 | <i>Mipep</i>   | NM_027436    | 4.49   | 0.231783 | <.00001  |
| Aged, Day 7 | <i>Dnajc19</i> | NM_026332    | 9.87   | 0.231839 | <.00001  |
| Aged, Day 7 | <i>Grpel1</i>  | NM_024478    | 2.15   | 0.175277 | 0.016379 |
| Aged, Day 7 | <i>Bak1</i>    | NM_007523    | 1.34   | 0.087229 | 0.001697 |
| Aged, Day 7 | <i>Ucp2</i>    | NM_011671    | -1.9   | 0.516107 | 0.031873 |
| Aged, Day 7 | <i>Bcl2l1</i>  | NM_009743    | 4.05   | 0.290585 | 0.003837 |
| Aged, Day 7 | <i>Stard3</i>  | NM_021547    | 4.03   | 0.039858 | 0.000727 |
| Aged, Day 7 | <i>Ucp3</i>    | NM_009464    | 19.72  | 0.273746 | 0.000654 |
| Aged, Day 7 | <i>Mtx2</i>    | NM_016804    | 4.18   | 0.157227 | 0.032098 |
| Aged, Day 7 | <i>Trp53</i>   | NM_011640    | 25.98  | 0.473444 | 0.004285 |
| Aged, Day 7 | <i>Bcl2</i>    | NM_009741    | 7.72   | 0.748018 | 0.010335 |

|                             |                |              |         |          |          |
|-----------------------------|----------------|--------------|---------|----------|----------|
| Aged, Day 7                 | <i>Cpt2</i>    | NM_009949    | 6.8     | 0.116384 | 0.002479 |
| Aged, Day 7                 | <i>Bnip3</i>   | NM_009760    | 1.82    | 0.154687 | 0.015362 |
| Aged, Day 7                 | <i>Ucp1</i>    | NM_009463    | 190.17  | 0.349982 | 0.004236 |
| Aged + Mitoquinol,<br>Day 7 | <i>Dnm1</i>    | NM_152816    | 1.17    | 0.397769 | 0.23858  |
| Aged + Mitoquinol,<br>Day 7 | <i>Uxt</i>     | NM_013840    | 8.57    | 0.426294 | <.00001  |
| Aged + Mitoquinol,<br>Day 7 | <i>Lrpprc</i>  | NM_028233    | 10.71   | 0.431704 | 0.009413 |
| Aged + Mitoquinol,<br>Day 7 | <i>Msto1</i>   | NM_144898    | 51.13   | 0.177585 | 0.004643 |
| Aged + Mitoquinol,<br>Day 7 | <i>Rhot1</i>   | NM_021536    | -46.91  | 0.469786 | <.00001  |
| Aged + Mitoquinol,<br>Day 7 | <i>Opa1</i>    | NM_133752    | -3.29   | 0.32921  | 0.00186  |
| Aged + Mitoquinol,<br>Day 7 | <i>Nefl</i>    | NM_010910    | 52.67   | 0.308935 | 0.000618 |
| Aged + Mitoquinol,<br>Day 7 | <i>Rhot2</i>   | NM_145999    | 2.4     | 0.415887 | 0.043976 |
| Aged + Mitoquinol,<br>Day 7 | <i>Fis1</i>    | NM_025562    | -3.81   | 0.267968 | <.00001  |
| Aged + Mitoquinol,<br>Day 7 | <i>Cox10</i>   | NM_178379    | 11.52   | 0.139843 | 0.000224 |
| Aged + Mitoquinol,<br>Day 7 | <i>Timm23</i>  | NM_016897    | -1.07   | 0.27862  | 0.755264 |
| Aged + Mitoquinol,<br>Day 7 | <i>Timm44</i>  | NM_011592    | -1.62   | 0.582019 | 0.00012  |
| Aged + Mitoquinol,<br>Day 7 | <i>Timm10</i>  | NM_013899    | 6.85    | 0.413409 | 0.003886 |
| Aged + Mitoquinol,<br>Day 7 | <i>Timm50</i>  | NM_025616    | 1.39    | 0.048376 | 0.217671 |
| Aged + Mitoquinol,<br>Day 7 | <i>Immp1l</i>  | NM_028260    | -1.64   | 0.048865 | <.00001  |
| Aged + Mitoquinol,<br>Day 7 | <i>Timm17a</i> | NM_011590    | 1.64    | 0.21643  | 0.026529 |
| Aged + Mitoquinol,<br>Day 7 | <i>Immp2l</i>  | NM_053122    | 2.44    | 0.312735 | 0.028918 |
| Aged + Mitoquinol,<br>Day 7 | <i>Timm8b</i>  | NM_013897    | 2.6     | 0.100162 | 0.008141 |
| Aged + Mitoquinol,<br>Day 7 | <i>Timm22</i>  | NM_019818    | -1.07   | 0.674714 | 0.897246 |
| Aged + Mitoquinol,<br>Day 7 | <i>Timm8a1</i> | NM_013898    | 16.95   | 0.042623 | 0.004286 |
| Aged + Mitoquinol,<br>Day 7 | <i>Timm9</i>   | NM_001024853 | 3.22    | 0.188356 | 0.024159 |
| Aged + Mitoquinol,<br>Day 7 | <i>Taz</i>     | NM_181516    | 1.78    | 0.037415 | 0.046644 |
| Aged + Mitoquinol,<br>Day 7 | <i>Timm17b</i> | NM_011591    | 7.19    | 0.553259 | 0.005694 |
| Aged + Mitoquinol,<br>Day 7 | <i>Tspo</i>    | NM_009775    | 1.01    | 0.346962 | 0.840712 |
| Aged + Mitoquinol,<br>Day 7 | <i>Aip</i>     | NM_016666    | -109.46 | 0.128616 | <.00001  |
| Aged + Mitoquinol,<br>Day 7 | <i>Hspd1</i>   | NM_010477    | -19.93  | 0.034826 | <.00001  |
| Aged + Mitoquinol,<br>Day 7 | <i>Mipep</i>   | NM_027436    | -9.01   | 0.114109 | <.00001  |

|                             |                |           |        |          |          |
|-----------------------------|----------------|-----------|--------|----------|----------|
| Aged + Mitoquinol,<br>Day 7 | <i>Dnajc19</i> | NM_026332 | 9.3    | 0.090138 | 0.003655 |
| Aged + Mitoquinol,<br>Day 7 | <i>Grpel1</i>  | NM_024478 | 1.67   | 0.081456 | 0.255945 |
| Aged + Mitoquinol,<br>Day 7 | <i>Bak1</i>    | NM_007523 | -97.99 | 0.021808 | <.00001  |
| Aged + Mitoquinol,<br>Day 7 | <i>Ucp2</i>    | NM_011671 | -8.34  | 0.180185 | <.00001  |
| Aged + Mitoquinol,<br>Day 7 | <i>Bcl2l1</i>  | NM_009743 | 3.21   | 0.16866  | 0.006696 |
| Aged + Mitoquinol,<br>Day 7 | <i>Stard3</i>  | NM_021547 | 1.79   | 0.052062 | 0.076156 |
| Aged + Mitoquinol,<br>Day 7 | <i>Ucp3</i>    | NM_009464 | 6.71   | 0.084753 | 0.007286 |
| Aged + Mitoquinol,<br>Day 7 | <i>Mtx2</i>    | NM_016804 | -7.42  | 0.076796 | <.00001  |
| Aged + Mitoquinol,<br>Day 7 | <i>Trp53</i>   | NM_011640 | 1.84   | 0.184653 | 0.091384 |
| Aged + Mitoquinol,<br>Day 7 | <i>Bcl2</i>    | NM_009741 | 6.91   | 0.396556 | 0.001698 |
| Aged + Mitoquinol,<br>Day 7 | <i>Cpt2</i>    | NM_009949 | 32.19  | 0.152104 | 0.014784 |
| Aged + Mitoquinol,<br>Day 7 | <i>Bnip3</i>   | NM_009760 | 2.79   | 0.084317 | 0.0115   |
| Aged + Mitoquinol,<br>Day 7 | <i>Ucp1</i>    | NM_009463 | 240.05 | 0.28728  | 0.003394 |

**Supplemental Table 2:** Fold change in mitochondrial gene expression in young and aged murine lung during influenza infection.
